# Supplementary material
Source: PubMed Central journal article supplement (PMC6658344)
Supplement: NIHMS1524279-supplement-1.pdf [file NIHMS1524279-supplement-1.pdf]

## Supplementary Files

**Title:** Comparison of fetal growth by maternal prenatal acetaminophen use

Melissa M. Smarr<sup>a,b</sup>, Ph.D., Joe Bible<sup>c</sup>, Ph.D., M.S., Nicole Gerlanc<sup>d</sup>, Ph.D., Germaine M. Buck Louis<sup>a,e</sup>, Ph.D., M.S., Alaina Bever<sup>a</sup>, B.S., Katherine L. Grantz<sup>a</sup>, M.D., M.S.,

**Supplemental Table S1** - Frequency of maternal acetaminophen use at enrollment and study visits, NICHD Fetal Growth Studies- Singletons.

**Supplemental Table S1** - Frequency of maternal acetaminophen use at enrollment and study visits, NICHD Fetal Growth Studies- Singletons.

| <i>Women taking only 1 APAP medication</i> | Enrollment<br>(n=474) | Visit 1<br>(n=465) | Visit 2<br>(n=347) | Visit 3<br>(n=269) | Visit 4<br>(n=220) | Visit 5<br>(n=85) |
|--------------------------------------------|-----------------------|--------------------|--------------------|--------------------|--------------------|-------------------|
| Use Frequency                              | n (%)                 | n (%)              | n (%)              | n (%)              | n (%)              | n (%)             |
| 1 - Less than once a month                 | 133 (28.1)            | 99 (21.3)          | 68 (19.6)          | 58 (21.6)          | 40 (18.18)         | 9 (10.6)          |
| 2 - Once a month                           | 69 (14.6)             | 59 (12.7)          | 46 (13.3)          | 33 (12.3)          | 24 (10.91)         | 17 (20.0)         |
| 3 - 2-3 times a month*                     | 114 (24.1)            | 139 (29.9)         | 109 (31.4)         | 76 (28.3)          | 52 (23.64)         | 15 (17.7)         |
| 4 - 1-2 times a week                       | 95 (20.0)             | 106 (22.8)         | 75 (21.6)          | 50 (18.6)          | 50 (22.73)         | 23 (27.1)         |
| 5 - 3-4 times a week                       | 30 (6.3)              | 31 (6.7)           | 24 (6.9)           | 30 (11.2)          | 24 (10.91)         | 7 (8.2)           |
| 6 - 5-6 times a week                       | 10 (2.1)              | 4 (0.9)            | 7 (2.0)            | 5 (1.9)            | 8 (3.64)           | 2 (2.4)           |
| 7 - Everyday                               | 20 (4.2)              | 26 (5.6)           | 18 (5.2)           | 16 (6.0)           | 22 (10)            | 12 (14.1)         |
| 98 - Don't Know                            | 3 (0.6)               | 1 (0.2)            | 0 (0.0)            | 1 (0.4)            | 0 (0.0)            | 0 (0.0)           |

  

| <i>Women taking 2 APAP medications</i> | Enrollment<br>(n=10) | Visit 1<br>(n=21) | Visit 2<br>(n=9) | Visit 3<br>(n=13) | Visit 4<br>(n=13) | Visit 5<br>(n=3) |
|----------------------------------------|----------------------|-------------------|------------------|-------------------|-------------------|------------------|
| Use Frequency                          | n (%)                | n (%)             | n (%)            | n (%)             | n (%)             | n (%)            |
| 1 - Less than once a month             | 4 (40)               | 6 (28.6)          | 1 (11.1)         | 5 (38.5)          | 4 (30.8)          | 1 (33.3)         |
| 2 - Once a month                       | 4 (40)               | 4 (19)            | 0 (0.0)          | 1 (7.7)           | 0 (0.0)           | 0 (0.0)          |
| 3 - 2-3 times a month*                 | 6 (60)               | 11 (52.4)         | 4 (44.4)         | 6 (46.2)          | 5 (38.5)          | 0 (0.0)          |
| 4 - 1-2 times a week                   | 2 (20)               | 5 (23.8)          | 6 (66.7)         | 3 (23.1)          | 3 (23.1)          | 2 (66.7)         |
| 5 - 3-4 times a week                   | 2 (20)               | 5 (23.8)          | 2 (22.2)         | 4 (30.8)          | 4 (30.8)          | 0 (0.0)          |
| 6 - 5-6 times a week                   | 1 (10)               | 3 (14.3)          | 1 (11.1)         | 1 (7.7)           | 3 (23.1)          | 0 (0.0)          |
| 7 - Everyday                           | 0 (0.0)              | 1 (4.8)           | 1 (11.1)         | 3 (23.1)          | 4 (30.8)          | 2 (66.7)         |
| 98 - Don't Know                        | 0 (0.0)              | 0 (0.0)           | 0 (0.0)          | 0 (0.0)           | 0 (0.0)           | 0 (0.0)          |

Abbreviation: APAP, acetaminophen.

\*women reported taking an acetaminophen containing medication 2-3 times a month but less than once a week.

**Title:** Comparison of fetal growth by maternal prenatal acetaminophen use

Melissa M. Smarr<sup>a,b</sup>, Ph.D., Joe Bible<sup>c</sup>, Ph.D., M.S., Nicole Gerlanc<sup>d</sup>, Ph.D., Germaine M. Buck Louis<sup>a,e</sup>, Ph.D., M.S., Alaina Bever<sup>a</sup>, B.S., Katherine L. Grantz<sup>a</sup>, M.D., M.S.,

**Supplemental Table S2** - Use patterns of maternal acetaminophen use at enrollment and study visits, NICHD Fetal Growth Studies- Singletons.

**Supplemental Table S2** - Use patterns of maternal acetaminophen use at enrollment and study visits, NICHD Fetal Growth Studies- Singletons (N=2312).

| Use Pattern                      | n    | %    |
|----------------------------------|------|------|
| <i>Trimester</i>                 |      |      |
| No use during gestation          | 1374 | 59.4 |
| 1st trimester only               | 153  | 6.6  |
| 2nd trimester only               | 179  | 7.7  |
| 3rd trimester only               | 138  | 6.0  |
| only 1st & 2nd trimesters        | 105  | 4.5  |
| only 2nd&3rd trimesters          | 137  | 5.9  |
| only 1st & 3rd trimesters        | 69   | 3.0  |
| Every trimester                  | 157  | 6.8  |
| <i>Visit</i>                     |      |      |
| Only Baseline                    | 153  | 6.6  |
| Only Visit 1                     | 129  | 5.6  |
| Only Visit 2                     | 61   | 2.6  |
| Only Visit 3                     | 43   | 1.9  |
| Only Visit 4                     | 31   | 1.3  |
| Only Visit 5                     | 8    | 0.3  |
| Every Visit (Baseline - Visit 5) | 18   | 0.8  |
| Sporadic Pattern                 | 495  | 21.4 |
| <i>Sporadic use patterns*</i>    |      |      |
| Baseline & Visit 1 only          | 71   | 7.6  |
| Baseline - Visit 2 only          | 31   | 3.3  |
| Baseline - Visit 3 only          | 0    | 0.0  |
| Baseline - Visit 4 only          | 0    | 0.0  |
| Baseline - Visit 5 only          | 18   | 1.9  |
| Visit 1 & 2 only                 | 27   | 2.9  |
| Visit 1 - 3 only                 | 16   | 1.7  |
| Visit 1 - 4 only                 | 11   | 1.2  |
| Visit 1 - 5 only                 | 2    | 0.2  |

\*All patterns are not reflected in this table.
